# Supplementary material
Source: PubMed Central journal article supplement (PMC3418695)
Supplement: supp_blood-2011-11-391722_blood-2011-11-391722-1.pdf [file supp_blood-2011-11-391722_blood-2011-11-391722-1.pdf]

| Pat. | FAB | Age | Sex | Sample | Cytogenetics               | Molecular genetics | Outcome                   |
|------|-----|-----|-----|--------|----------------------------|--------------------|---------------------------|
| 1    | M1  | 77  | M   | PBMC   | C.K.                       | N.A.               | Dead                      |
| 2    | M2  | 62  | F   | PBMC   | N.K.                       | FLT3-ITD+<br>NPM1+ | Chemo<br>A&W 108 mo.      |
| 3    | M2  | 42  | F   | PBMC   | N.K.                       | FLT3-ITD+<br>NPM1+ | Allo-SCT<br>A&W 15 mo.    |
| 4    | M2  | 53  | M   | PBMC   | N.K.                       | N.D.               | Allo-SCT<br>Relapse 2 mo. |
| 5    | M4  | 61  | M   | PBMC   | Inv (16)                   | N.D.               | Chemo<br>A&W 24 mo.       |
| 6    | M4  | 23  | M   | PBMC   | t(16;16), -21q             | N.D.               | Allo-SCT<br>A&W 15 mo.    |
| 7    | M4  | 77  | M   | PBMC   | N.K.                       | FLT3-ITD+          | Dead                      |
| 8    | M4  | 60  | F   | PBMC   | N.K.                       | NPM1+              | Chemo<br>A&W 23 mo.       |
| 9    | M4  | 48  | F   | PBMC   | N.K.                       | NPM1+              | Chemo<br>Dead 1 mo.       |
| 10   | M5  | 67  | F   | PBMC   | 46,XX,t(9;11)<br>(p21;q23) | N.D.               | Relapse                   |
| 11   | M1  | 67  | M   | BM     | N.K.                       | N.A.               | Dead 3 mo.                |
| 12   | M1  | 21  | F   | BM     | 46,XX,i(17q)               | N.A.               | Allo-SCT<br>CR            |
| 13   | M1  | 63  | F   | BM     | C.K.                       | N.A.               | Not known                 |
| 14   | M1  | 69  | F   | BM     | C.K.                       | N.A.               | Not known                 |
| 15   | M1  | 63  | F   | BM     | N.K.                       | N.A.               | Dead 3 mo.                |
| 16   | M2  | 65  | M   | BM     | N.K.                       | N.A.               | Dead 2 mo.                |
| 17   | M2  | 66  | M   | BM     | N.A.                       | N.A.               | Not known                 |
| 18   | M2  | 65  | M   | BM     | N.K.                       | CEBPA+             | Dead                      |
| 19   | M2  | 39  | M   | BM     | 46,XX<br>del7, t(8;21)     | N.D.               | Allo-SCT<br>Dead (GvHD)   |
| 20   | M2  | 75  | M   | BM     | N.K.                       | N.D.               | Dead 1 mo.                |
| 21   | M4  | 73  | M   | BM     | C.K.                       | N.A.               | Dead 3 mo.                |
| 22   | M4  | 64  | M   | BM     | N.K.                       | N.A.               | C.R.                      |
| 23   | M4  | 69  | M   | BM     | N.K.                       | N.A.               | Chemo<br>A&W 60 mo.       |
| 24   | M4  | 77  | F   | BM     |                            | N.D.               | Dead                      |
| 25   | M4  | 77  | F   | BM     | N.K.                       | FLT3-ITD+<br>NPM1+ | Dead 1 mo.                |
| 26   | M5b | 34  | F   | BM     | N.K.                       | N.A.               | Dead 3 mo.                |

**Supplemental Table 1. Patient Characteristics.** N.A. -Not Available; C.K. -Complex Karyotype; N.K. -Normal Karyotype; N.D. -None Detected; A&W -Alive and Well; C.R. -Complete Remission; GvHD -Graft versus Host Disease.

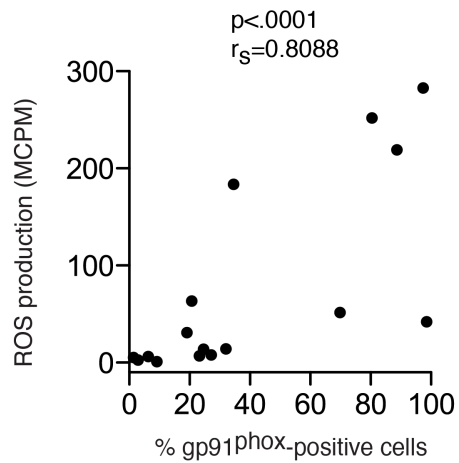

**Figure S1. Correlation of gp91<sup>phox</sup>/NADPH oxidase expressing cells and ROS production in leukemic BM.** Unsorted BM cells (*Patients 11-26*) recovered at diagnosis from untreated patients with FAB-M1 AML (n=5), FAB-M2 AML (n=5), and FAB-M4/M5 AML (n=6) were stimulated with PMA and assayed for ROS production (ordinate) and frequency (%) of cells expressing gp91<sup>phox</sup> (abscissa).

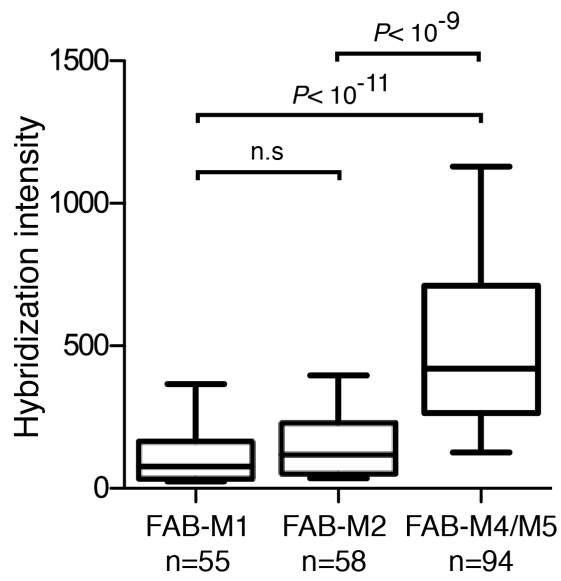

**Figure S2. Gp91<sup>phox</sup> mRNA levels in untreated AML patients.** Analysis of microarray data from 207 patients with untreated AML.

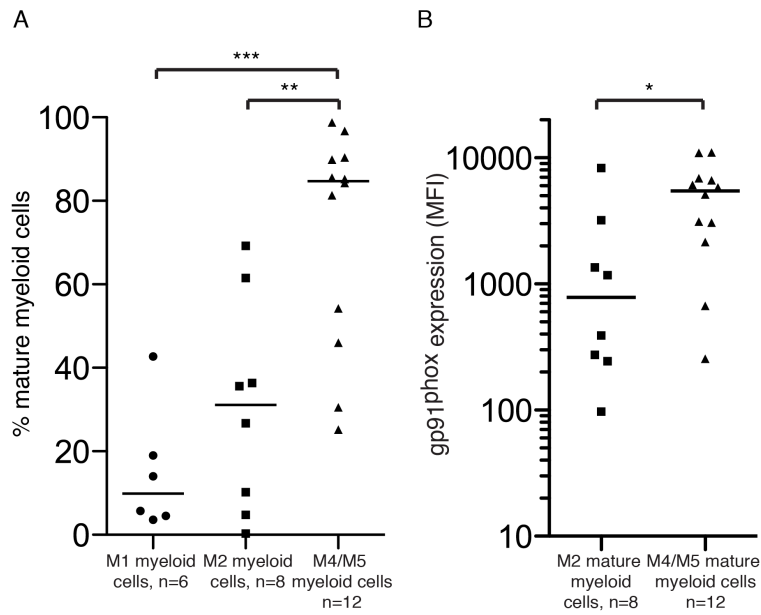

**Figure S3. Expression of gp91<sup>phox</sup> by mature cells in FAB-M1, FAB-M2, and FAB-M4/M5 AML.**

Data points indicated % mature myeloid cells (defined as CD33<sup>+</sup> with expression of CD14<sup>+</sup> and/or CD15<sup>+</sup> and analyzed by FACS) in peripheral blood or BM of untreated patients from AML patients with indicated FAB classes; left). The right part of the figure shows the median fluorescence intensity of gp91<sup>phox</sup> in similarly gated mature cells from BM or peripheral blood of the patients with FAB-M2 or FAB-M4/M5 AML.

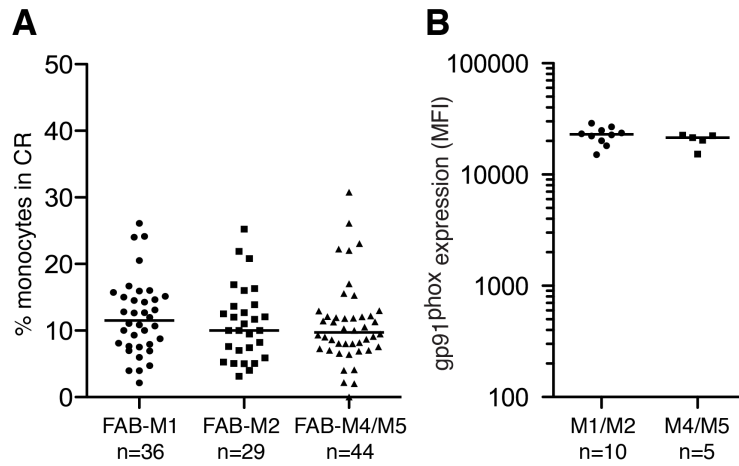

**Figure S4. No differences between monocytes in AML patients in CR.** (A) Blood counts from 109 patients in CR were analyzed in regard of proportions of circulating monocytes. (B) Analysis of gp91<sup>phox</sup> expression on CD14<sup>+</sup> monocytes from 15 patients in CR1 revealed no statistical differences.

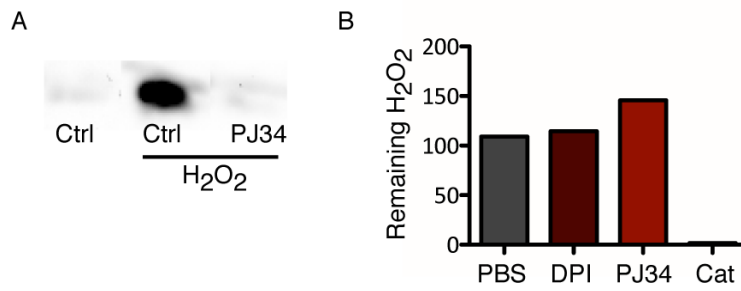

**Figure S5. PJ34 inhibit PAR formation in lymphocytes.** (A) PAR detection by western blot. Lymphocytes where exposed to hydrogen peroxide (500 $\mu$ M) and PAR formation analyzed by western blot after 20 min in the presence or absence of PARP-1 inhibitor PJ34. (B) Remaining H<sub>2</sub>O<sub>2</sub> was measured after incubation with PBS, DPI (3 $\mu$ M), PJ34 (0.5 $\mu$ M) or catalase (200U/ml). Only catalase hade H<sub>2</sub>O<sub>2</sub> scavenging properties.
